# Supplementary material for: The impact and cost-effectiveness of user fee exemption by contracting out essential health package services in Malawi
Source: PubMed Central journal article supplement — BMJ Glob Health. 2019 Apr 20;4(2):e001286. doi: 10.1136/bmjgh-2018-001286 (PMC6509600; doi:10.1136/bmjgh-2018-001286), 2019-04-20
Supplement: bmjgh-2018-001286supp001.pdf [file bmjgh-2018-001286supp001.pdf]

## Appendixes

### **Appendix 1. Definition of the selected indicators for the analysis**

Coverage of antenatal care (ANC): Total number of pregnant women who made at least one ANC visit at a health facility during pregnancy divided by the estimated number of pregnant women in the catchment area.

Coverage of postnatal care (PNC): Total number of women who made at least one postpartum care visit 2 weeks after delivery at a health facility divided by the estimated number of pregnant women in the catchment area.

Coverage of delivery by skilled birth attendants (DSBA): The total number of deliveries by trained personnel divided by the estimated number of pregnant women in the catchment area.

Coverage of bacillus Calmette-Guerin (BCG) vaccination: Total number of children receiving BCG vaccination divided by the estimated number of children under the age of 1.

Coverage of polio vaccination: Total number of child receiving polio vaccination divided by the estimated number of children under the age of 1.

Coverage of pentavalent vaccination: Total number of children receiving pentavalent vaccination divided by the estimated number of children under the age of 1.

**Appendix 2. Derivation of confidence interval of each indicator for 95% confidence interval of composite parameter for LiST modelling.**

Assuming the impact of SLA on coverage of six indicators are estimated as  $b_1$ - $b_6$ , with standard errors of  $se_1 - se_6$ .

As we assume the six indicators are additive and independent, then the variance of linear combination of the six indicators are estimated as

$$Var_{composite} = se_1^2 + se_2^2 + se_3^2 + se_4^2 + se_5^2 + se_6^2$$

After we conducted the regression model, we realized the  $se_1$  through  $se_6$  are quite close (please see the table below), to further simplify the calculation, let us assume  $se_1^2 \cong se_2^2 \cong \dots \cong se_6^2 \cong se_{common}^2$ . Then

$$Var_{composite} = 6se_{common}^2, \text{ and } se_{composite} = \sqrt{6} * se_{common}$$

Standard errors of the coefficients for the six health services

| Indicator | Standard Error |
|-----------|----------------|
| ANC       | 0.054          |
| PNC       | 0.043          |
| DSBA      | 0.033          |
| BCG       | 0.046          |
| Penta     | 0.040          |
| Polio     | 0.042          |
| Average   | 0.043          |

By definition, the 95% confidence interval of linear combination of the six indicators would be

$$mean \pm 1.96 * \sqrt{6} * se_{common}$$

To arrive such a boundary, the number of deviation for each indicator is estimated to be

$$\frac{1.96 * \sqrt{6}}{6} = 0.8, \text{ which is equivalent to 42\% of confidence interval.}$$

### Appendix 3

Table A1. Random effects model examining the impact of service level agreements on utilization of key maternal and child health services

| Variable | ANC       | PNC      | DSBA      | BCG       | Pentavalent | Polio    |
|----------|-----------|----------|-----------|-----------|-------------|----------|
| SLA      | 0.127*    | 0.136**  | 0.174***  | 0.059     | 0.008       | 0.009    |
| Month 1  | Reference |          |           |           |             |          |
| Month 2  | -0.002    | -0.061   | -0.106**  | -0.104*   | -0.029      | 0.028    |
| Month 3  | 0.138*    | -0.081   | -0.120*** | -0.063    | 0.118**     | 0.117*   |
| Month 4  | 0.054     | -0.037   | -0.129*** | -0.101*   | 0.047       | 0.083    |
| Month 5  | -0.043    | -0.106*  | -0.087*   | -0.130*   | 0.028       | 0.070    |
| Month 6  | -0.105    | -0.030   | -0.054    | -0.101*   | 0.022       | 0.096*   |
| Month 7  | -0.055    | -0.075   | -0.042    | -0.114*   | -0.023      | 0.027    |
| Month 8  | -0.081    | -0.070   | -0.022    | -0.094    | 0.039       | 0.077    |
| Month 9  | -0.038    | -0.025   | -0.035    | -0.124*   | 0.005       | 0.026    |
| Month 10 | -0.047    | -0.038   | -0.074*   | -0.112*   | -0.008      | 0.018    |
| Month 11 | -0.080    | -0.070   | -0.101**  | -0.191*** | -0.016      | -0.016   |
| Month 12 | -0.028    | 0.085    | -0.027    | -0.198*** | -0.063      | -0.072   |
| Month 13 | -0.184*   | -0.016   | -0.116**  | -0.163*   | -0.036      | 0.032    |
| Month 14 | -0.067    | -0.218** | -0.194*** | -0.209**  | -0.106      | -0.06    |
| Month 15 | -0.074    | -0.134*  | -0.160*** | -0.228*** | -0.056      | -0.065   |
| Month 16 | -0.069    | -0.083   | -0.162*** | -0.238*** | -0.076      | -0.067   |
| Month 17 | -0.056    | -0.112   | -0.200*** | -0.238*** | -0.061      | -0.103   |
| Month 18 | -0.357*** | -0.175*  | -0.194*** | -0.272*** | -0.033      | -0.029   |
| Month 19 | -0.151    | -0.157*  | -0.169*** | -0.253*** | -0.044      | 0.000    |
| Month 20 | -0.238**  | -0.090   | -0.051    | -0.087    | 0.017       | 0.044    |
| Month 21 | -0.280*** | -0.094   | -0.106*   | -0.100    | -0.039      | -0.007   |
| Month 22 | -0.037    | -0.209** | -0.214*** | -0.287*** | -0.126*     | -0.123   |
| Month 23 | -0.181*   | -0.150*  | -0.170*** | -0.255*** | -0.074      | -0.052   |
| Month 24 | -0.145    | -0.138   | -0.129**  | -0.293*** | -0.130*     | -0.112   |
| Constant | 0.850***  | 0.371*** | 0.673***  | 0.922***  | 0.765***    | 0.735*** |

\*p<0.05, \*\*p<0.01, \*\*\*p<0.001

Notes: ANC denotes antenatal care, PNC denotes postnatal care, DSBA denotes delivery by skilled birth attendants, BCG denotes bacillus Calmette-Guerin vaccine, pentavalent denotes pentavalent vaccination, polio denotes polio vaccination.

## Appendix 4

Table A2. Key Parameters used in LiST

| Common parameters           |           |      |
|-----------------------------|-----------|------|
| Population size             | 1,209,205 |      |
| Fertility rate              | 4.95      |      |
| Coverage of health services | No SLA    | SLA  |
| ANC                         | 79.1      | 92.9 |
| Skilled birth attendance    | 57.8      | 76.9 |
| PNC                         | 31.0      | 44.1 |
| BCG                         | 77.0      | 86.6 |
| Pentavalent                 | 74.5      | 78.1 |
| Polio                       | 73.7      | 78.1 |

Notes: SLA denotes service-level agreement; ANC denotes antenatal care, PNC denotes postnatal care, BCG denotes bacillus Calmette-Guerin vaccine, pentavalent denotes pentavalent vaccination, polio denotes polio vaccination.

## Appendix 5

Table A3. Lives saved by causes for both children under age 5 and pregnant women\*

| Causes                 | Point estimate | Lower bound | Upper bound |
|------------------------|----------------|-------------|-------------|
| Children under 5       |                |             |             |
| Neonatal - Sepsis      | 116            | 98          | 135         |
| Neonatal - Pneumonia   | 32             | 26          | 36          |
| Neonatal - Asphyxia    | 138            | 119         | 158         |
| Neonatal - Prematurity | 71             | 61          | 81          |
| Neonatal - Tetanus     | 2              | 2           | 2           |
| Diarrhea               | -1             | 0           | -1          |
| Pneumonia              | 10             | 0           | 20          |
| Meningitis             | 3              | 0           | 6           |
| Measles                | -1             | -1          | -1          |
| Malaria                | -1             | 0           | -1          |
| Pertussis              | 4              | 0           | 8           |
| Injury                 | 0              | 0           | -1          |
| Other                  | -3             | -3          | -3          |
| Sub total              | 370            | 302         | 439         |
| Pregnant women         |                |             |             |
| Antepartum hemorrhage  | 7              | 6           | 8           |
| Postpartum hemorrhage  | 21             | 18          | 24          |
| Hypertensive disorders | 20             | 17          | 23          |
| Sepsis                 | 13             | 11          | 15          |
| Other direct causes    | 2              | 1           | 2           |
| Sub total              | 63             | 53          | 72          |
| Total                  | 433            | 355         | 511         |

\*Note: The results are slightly different from Table 3 due to rounding.
